# Supplementary material for: Weighting Primary Care Patient Panel Size: A Novel Electronic Health Record-Derived Measure Using Machine Learning
Source: PubMed Central journal article supplement (PMC5086026; doi:10.2196/medinform.6530), 2016-10-14
Supplement: medinform_v4i4e29_app2.pdf [file medinform_v4i4e29_app2.pdf]

Multimedia Appendix 1. Patient characteristics of each utilization phenotype in the training set (n=24,324).

| Characteristics                            | Utilization phenotype |             |             |             |             |             |             |                  |               |
|--------------------------------------------|-----------------------|-------------|-------------|-------------|-------------|-------------|-------------|------------------|---------------|
|                                            | Inactive              | A           | B           | C           | D           | E           | F           | G                | Total sample  |
| Size of group                              | 3986                  | 5343        | 6991        | 3000        | 2452        | 2082        | 430         | 40               | 24,324        |
| Age, years, mean (SD)                      | 41.9 (17.3)           | 47.7 (14.7) | 53.7 (16.8) | 56.6 (16.4) | 59.9 (17.3) | 65.1 (16.8) | 67.4 (16.3) | 60.5 (14.4)      | 52.7 (17.9)   |
| Male, n (%)                                | 1551 (38.9)           | 2057 (38.5) | 2678 (38.3) | 1083 (36.1) | 922 (37.6)  | 716 (34.4)  | 158 (36.7)  | 8 (20)           | 9170 (37.7)   |
| White, n (%)                               | 1814 (45.5)           | 2875 (53.8) | 3293 (47.1) | 1635 (54.5) | 1324 (54.0) | 799 (38.4)  | 191 (44.4)  | 14 (35)          | 11,943 (49.1) |
| Asian, n (%)                               | 694 (17.4)            | 1095 (20.5) | 1734 (24.8) | 675 (22.5)  | 596 (24.3)  | 525 (25.2)  | 76 (18)     | 4 (10)           | 5400 (22.2)   |
| Black, n (%)                               | 379 (9.5)             | 289 (5.4)   | 587 (8.4)   | 222 (7.4)   | 184 (7.5)   | 385 (18.5)  | 102 (23.7)  | 17 (43)          | 2165 (8.9)    |
| Commercial, n (%)                          | 2738 (68.7)           | 4266 (79.9) | 4348 (62.2) | 1731 (57.7) | 1113 (45.4) | 431 (20.7)  | 26 (6)      | 3 (8)            | 14,665 (60.3) |
| Medicare or Medicaid, n (%)                | 1068 (26.8)           | 992 (18.6)  | 2545 (36.4) | 1245 (41.5) | 1324 (54.0) | 1628 (78.2) | 402 (93.5)  | 37 (93)          | 9219 (38.0)   |
| Other payer, n (%)                         | 180 (4.5)             | 85 (2)      | 98 (1)      | 24 (1)      | 15 (1)      | 23 (1)      | 2 (1)       | N/A <sup>a</sup> | 440 (1.8)     |
| Active medications at PCP visit, mean (SD) | 0 (0)                 | 2.3 (2.9)   | 5 (3.6)     | 5.5 (4.3)   | 8.1 (6)     | 11 (5)      | 15.7 (6.1)  | 16.2 (9.3)       | 4.7 (5.2)     |
| Primary care visits, mean (SD)             | 0 (0)                 | 0.7 (0.5)   | 2.6 (1.3)   | 2.1 (1.4)   | 2.9 (2.3)   | 7 (2.8)     | 11.5 (4.5)  | 33.2 (10)        | 2.3 (3)       |
| Weighted primary care visits, mean (SD)    | 0 (0)                 | 0.7 (0.6)   | 3.2 (1.8)   | 2.8 (1.9)   | 4.3 (3.7)   | 10.7 (4.4)  | 19.1 (7.8)  | 53.1 (15.6)      | 3.2 (4.7)     |
| No-show visits, mean (SD)                  | 0.1 (0.4)             | 0.2 (0.7)   | 0.5 (1)     | 0.6 (1.2)   | 1.4 (2.1)   | 1.8 (2.4)   | 4.3 (4.9)   | 6.2 (5.3)        | 0.7 (1.6)     |
| Urgent care visits, mean (SD)              | 0 (0)                 | 0.1 (0.5)   | 0.2 (0.5)   | 0.2 (0.6)   | 0.2 (0.6)   | 0.2 (0.7)   | 0.5 (1.2)   | 1.2 (2.4)        | 0.1 (0.5)     |

| Characteristics                                    | Utilization phenotype |           |           |           |            |            |             |             |              |
|----------------------------------------------------|-----------------------|-----------|-----------|-----------|------------|------------|-------------|-------------|--------------|
|                                                    | Inactive              | A         | B         | C         | D          | E          | F           | G           | Total sample |
| Telephone encounters, mean (SD)                    | 0 (0)                 | 0.4 (0.7) | 1.7 (1.8) | 1.4 (1.6) | 2.3 (2.5)  | 5.9 (3.8)  | 19.4 (10.3) | 18.5 (22.5) | 1.9 (3.8)    |
| Emergency department visits, mean (SD)             | 0 (0)                 | 0 (0)     | 0.2 (0.5) | 0.2 (0.5) | 0.3 (0.7)  | 0.5 (1)    | 1.6 (2.9)   | 1.8 (2.1)   | 0.2 (0.7)    |
| Emergent hospitalizations, mean (SD)               | 0 (0)                 | 0 (0)     | 0 (0.2)   | 0 (0.3)   | 0.1 (0.5)  | 0.2 (0.5)  | 0.9 (1.7)   | 0.9 (1.5)   | 0.1 (0.4)    |
| Elective hospitalizations, mean (SD)               | 0 (0)                 | 0 (0)     | 0 (0)     | 0 (0.2)   | 0.1 (0.3)  | 0 (0.2)    | 0.1 (0.4)   | 0 (0.2)     | 0 (0.1)      |
| Specialist visits (capped), mean (SD)              | 0 (0)                 | 1 (1.2)   | 1 (1)     | 5.5 (1.4) | 14 (5.3)   | 4.4 (3.3)  | 11.5 (8.2)  | 7.6 (9.2)   | 3.2 (4.9)    |
| Infusion visits, mean (SD)                         | 0 (0)                 | 0 (0.5)   | 0 (0.4)   | 0.1 (1)   | 0.7 (4.1)  | 0.1 (2.2)  | 0.1 (1.1)   | 0 (0.2)     | 0.1 (1.5)    |
| Transfusion visits, mean (SD)                      | 0 (0)                 | 0 (0.8)   | 0 (0.2)   | 0.1 (0.8) | 0.4 (2.6)  | 0 (0.6)    | 0.5 (3.3)   | 0.2 (1.3)   | 0.1 (1.1)    |
| Radiology or procedure visits, mean (SD)           | 0 (0)                 | 0.4 (0.8) | 0.6 (1)   | 1.2 (1.4) | 2.2 (2.6)  | 1.5 (1.7)  | 2.7 (3)     | 2.5 (2.9)   | 0.8 (1.5)    |
| Secure electronic messages to patient, mean (SD)   | 0 (0)                 | 0.7 (1.4) | 2.3 (4.3) | 4 (6.4)   | 6.8 (11.1) | 3.4 (7.8)  | 5.6 (14.6)  | 5 (14.5)    | 2.4 (6.1)    |
| Secure electronic messages from patient, mean (SD) | 0 (0)                 | 0.9 (1.8) | 2.8 (5.3) | 5 (8.2)   | 8.9 (15)   | 4.4 (10.4) | 8.1 (22.3)  | 8.6 (25.5)  | 3.1 (8.1)    |

<sup>a</sup>N/A: not applicable.
