# Supplementary material for: Weighting Primary Care Patient Panel Size: A Novel Electronic Health Record-Derived Measure Using Machine Learning
Source: PubMed Central journal article supplement (PMC5086026; doi:10.2196/medinform.6530), 2016-10-14
Supplement: medinform_v4i4e29_app3.pdf [file medinform_v4i4e29_app3.pdf]

Multimedia Appendix 2: Patient Characteristics of each Primary Care Work Cluster in the Training Set (n=24,324)

|                                            | Primary Care Work Cluster |             |             |             | Total sample  |
|--------------------------------------------|---------------------------|-------------|-------------|-------------|---------------|
|                                            | Inactive                  | Low         | Medium      | High        |               |
| Size of group                              | 3986                      | 12003       | 5534        | 2801        | 24,324        |
| Age, mean (SD)                             | 41.9 (17.3)               | 51 (16.2)   | 57.8 (16.9) | 65 (16.6)   | 52.7 (17.9)   |
| Male, n (%)                                | 1551 (38.9)               | 4621 (38.5) | 2025 (36.6) | 980 (35)    | (37.7)        |
| White, n (%)                               | 1814 (45.5)               | 5941 (49.5) | 2999 (54.2) | 1196 (42.7) | (49.1)        |
| Asian, n (%)                               | 694 (17.4)                | 2797 (23.3) | 1284 (23.2) | 633 (22.6)  | (22.2)        |
| Black, n (%)                               | 379 (9.5)                 | 864 (7.2)   | 404 (7.3)   | 513 (18.3)  | (8.9)         |
| Commercial, n (%)                          | 2738 (68.7)               | 8390 (69.9) | 2944 (53.2) | 585 (20.9)  | 14,665 (60.3) |
| Medicare or Medicaid, n (%)                | 1068 (26.8)               | 3433 (28.6) | 2546 (46.0) | 2191 (78.2) | 9219 (38.0)   |
| Other, n (%)                               | 180 (4.5)                 | 180 (1.5)   | 44 (1)      | 25 (1)      | 440 (1.8)     |
| Active medications at PCP visit, mean (SD) | 0 (0)                     | 3.8 (3.6)   | 6.5 (5.2)   | 11.7 (5.7)  | 4.7 (5.2)     |
| Primary care visits, mean (SD)             | 0 (0)                     | 1.8 (1.4)   | 2.4 (1.8)   | 7.7 (5)     | 2.3 (3)       |
| Weighted primary care visits, mean (SD)    | 0 (0)                     | 2.1 (1.8)   | 3.4 (2.9)   | 12.1 (8.1)  | 3.2 (4.7)     |
| No-show visits, mean (SD)                  | 0.1 (0.4)                 | 0.4 (0.9)   | 0.9 (1.7)   | 2.2 (3.1)   | 0.7 (1.6)     |
| Urgent care visits, mean (SD)              | 0 (0)                     | 0.1 (0.5)   | 0.2 (0.6)   | 0.3 (0.9)   | 0.1 (0.5)     |
| Telephone encounters, mean (SD)            | 0 (0)                     | 1.1 (1.5)   | 1.8 (2.1)   | 7.8 (7.9)   | 1.9 (3.8)     |

|                                                    | Primary Care Work Cluster |           |           |            | Total sample |
|----------------------------------------------------|---------------------------|-----------|-----------|------------|--------------|
|                                                    | Inactive                  | Low       | Medium    | High       |              |
| Emergency department visits, mean (SD)             | 0 (0)                     | 0.1 (0.4) | 0.2 (0.6) | 0.6 (1.5)  | 0.2 (0.7)    |
| Emergent hospitalizations, mean (SD)               | 0 (0)                     | 0 (0.1)   | 0.1 (0.4) | 0.3 (0.9)  | 0.1 (0.4)    |
| Routine hospitalizations, mean (SD)                | 0 (0)                     | 0 (0)     | 0 (0.2)   | 0.1 (0.2)  | 0 (0.1)      |
| Specialist visits (capped), mean (SD)              | 0 (0)                     | 1 (1.1)   | 8.7 (5.6) | 6.4 (6)    | 3.2 (4.9)    |
| Infusion visits, mean (SD)                         | 0 (0)                     | 0 (0.5)   | 0.3 (2.6) | 0.2 (2.6)  | 0.1 (1.5)    |
| Transfusion visits, mean (SD)                      | 0 (0)                     | 0 (0.5)   | 0.2 (1.7) | 0.2 (1.6)  | 0.1 (1.1)    |
| Radiology or procedure visits, mean (SD)           | 0 (0)                     | 0.5 (0.9) | 1.5 (1.9) | 1.9 (2.3)  | 0.8 (1.5)    |
| Secure electronic messages to patient, mean (SD)   | 0 (0)                     | 1.2 (2.3) | 4.5 (6.1) | 6.6 (13.5) | 2.4 (6.1)    |
| Secure electronic messages from patient, mean (SD) | 0 (0)                     | 1.5 (2.7) | 5.8 (7.7) | 8.9 (18.8) | 3.1 (8.1)    |
