# Supplementary material for: Weighting Primary Care Patient Panel Size: A Novel Electronic Health Record-Derived Measure Using Machine Learning
Source: PubMed Central journal article supplement (PMC5086026; doi:10.2196/medinform.6530), 2016-10-14
Supplement: medinform_v4i4e29_app4.pdf [file medinform_v4i4e29_app4.pdf]

Multimedia Appendix 4: Log-Linear model of primary care office visits (without telephone visits) based on demographic variables and baseline utilization phenotype

| Model predictors                        | Adjusted $R^2$ | AIC <sup>a</sup> |
|-----------------------------------------|----------------|------------------|
| Age-sex <sup>b</sup>                    | .135           | 49,638           |
| Payer <sup>c</sup>                      | .112           | 49,989           |
| Naïve phenotypes (NP) <sup>d</sup>      | .241           | 46,261           |
| Utilization phenotype (UP) <sup>e</sup> | .296           | 44,344           |
| Age-sex and payer                       | .173           | 48,505           |
| Age-sex, payer, and NP                  | .306           | 44,147           |
| Age-sex, payer, and UP                  | .344           | 42,695           |

<sup>a</sup>Akaike Information Criterion

<sup>b</sup>Age-sex bins are categorical variables of the combination of male or female with the following age groups: 18-34, 35-49, 50-64, 65-69, 70-84,85-115.

<sup>c</sup>Payer were defined as commercial, Medicare/Medical, or Other

<sup>d</sup>The naïve phenotype is a categorical variable that was obtained by summing to the total number of healthcare encounters in the baseline year. These values were rank ordered and divided into seven percentiles

<sup>e</sup>The utilization phenotype is a categorical variable encoding one of the seven phenotypes clusters created by our algorithm.
